# Supplementary material for: Reconfiguration of a mixed-valence copper complex during CO2 electroreduction promotes CO2-to-C2H4 conversion
Source: Royal Society of Chemistry journal article supplement (doi:10.1039/d5dt01169h), 2025-01-01
Supplement: d5dt01169h1.pdf [file d5dt01169h1.pdf]

## Supporting Information

### Reconfiguration of a mixed-valence copper complex during CO<sub>2</sub> electroreduction promotes CO<sub>2</sub>-to-C<sub>2</sub>H<sub>4</sub> conversion

Xinkai Wang,<sup>‡a</sup> Yang Yang,<sup>‡a,b</sup> Xian-Ming Zhang<sup>\*a,c</sup>

*<sup>a</sup>Key Laboratory of Interface Science and Engineering in Advanced Material (Ministry of Education), College of Chemistry & Chemical Engineering, Taiyuan University of Technology, Taiyuan, 030024, P. R. China.*

*<sup>b</sup>College of Materials Science and Engineering, Qiqihar University, Qiqihar, Heilongjiang, 161006, P. R. China.*

*<sup>c</sup>Key Laboratory of Magnetic Molecules and Magnetic Information Materials (Ministry of Education), Institute of Chemistry and Culture, School of Chemistry & Materials Science, Shanxi Normal University, Taiyuan, 030006, P. R. China.*

<sup>‡</sup>These authors contributed equally to this work.

E-mail: zhangxianming@tyut.edu.cn

## ***Materials***

$\text{CuCl}_2 \cdot 2\text{H}_2\text{O}$  (Macklin, 99.99%), 1,10-phenanthroline (Macklin, 97%), 2,2'-diphenic acid (Macklin, 98%), ethanol (AR) were used without any further purification. The deionized water ( $18.25 \text{ M}\Omega \text{ cm}^{-1}$ ) used in all experiments was prepared by ultra-pure purification system (Ulupure).

## ***Synthesis of $[\text{CuCl}(\text{phen})_2][\text{CuCl}_2]$***

Typically, 15 mL of ethanol and 5 mL of deionized water were added into a 50 mL glass beaker and stirred at 500 rpm at room temperature. 0.117 g of 1,10-phenanthroline (phen) and 0.121 g of 2,2'-diphenic acid were sequentially added to the beaker and dissolved gradually. The mixture was stirred for 20 min. Then, 0.085 g of  $\text{CuCl}_2 \cdot 2\text{H}_2\text{O}$  was added to the beaker. After the solution was continuously stirred for 1 h, the resulting mixture was transferred into a 50 mL Teflon-lined autoclave and heated at  $160^\circ\text{C}$  for 5 days. After the reaction, dark green crystals were observed on the bottom and wall of the reaction kettle. The remaining solid was collected through continuous centrifugation and washed with water and ethanol until the washing solution was clear. Finally, the solid was dried in a vacuum oven at  $60^\circ\text{C}$  for 12 h to obtain the  $[\text{CuCl}(\text{phen})_2][\text{CuCl}_2]$  catalyst.

## ***Synthesis of $\text{CuCl}(\text{phen})_2$***

To synthesis  $\text{CuCl}(\text{phen})_2$ , 85 mg  $\text{CuCl}_2 \cdot 2\text{H}_2\text{O}$  and 180 mg phen were dissolved in 30 mL methanol and 70 mL  $\text{CH}_2\text{Cl}_2$  under stirring, respectively. Then, the two solutions

were mixed and heat-treated at 60 °C for 12 h. After the reaction, the solvent was removed by rotary evaporation. The remaining green powder was washed with water and CH<sub>2</sub>Cl<sub>2</sub> until the washing solution was clear. Finally, the solid powder was dried in a vacuum oven at 60 °C for 12 h to obtain the CuCl(phen)<sub>2</sub> catalyst.

### ***Characterizations***

X-ray diffraction (XRD) patterns were collected on a Smartlab X-ray diffractometer (Rigaku, Japan). Scanning electron microscopy (SEM) images were obtained using a JSM-7900F field emission scanning electron microscope (JEOL, Japan). Transmission electron microscopy (TEM) images were acquired on a F200 transmission electron microscope (JEOL, Japan). X-ray photoelectron spectroscopy (XPS) measurements were performed on an ESCALAB Xi+ X-ray photoelectron spectrometer (Thermo Scientific, USA). In situ attenuated total reflection infrared (ATR-IR) experiments were performed on an Invenio S spectrometer (Bruker, Germany).

### ***Preparation of working electrodes***

The catalyst ink was prepared by ultrasonically dispersing 5 mg catalyst in a mixture of 600 µL isopropyl alcohol, 350 µL of deionized water and 50 µL of 5 wt% Nafion solution. After sonication for 1 h, 10 µL of the ink was dripped on glassy carbon electrode with a 5 mm diameter. Alternatively, 200 µL of the ink was coated on the carbon paper with an exposed area of 1×1 cm<sup>2</sup>. Finally, these prepared electrodes were dried at room temperature for 3 h to obtain working electrodes.

### ***Electrochemical CO<sub>2</sub> reduction testing in an H-type cell***

ECO<sub>2</sub>RR tests were performed in a three-electrode two-compartment H-cell (CH2010-S, ida) controlled by an electrochemical workstation (CHI760e, Chenhua). The two chambers were separated by a proton exchange membrane (Nafion N117, Dupont). The working electrode was a glassy carbon electrode coated with catalyst, the reference electrode was an Ag/AgCl electrode (saturated KCl solution), and the counter electrode was a platinum sheet electrode. The working electrode and reference electrode were placed in the cathodic cell, while the counter electrode was placed in the anodic cell. Each cell was filled with 30 mL of 0.1 M KHCO<sub>3</sub> solution. During the ECO<sub>2</sub>RR experiments, the flow rate of CO<sub>2</sub> was maintained at 25 mL min<sup>-1</sup>, and the cathode chamber was stirred at 500 rpm throughout the test. Before the test, CO<sub>2</sub> gas was pumped into the cathode chamber electrolyte for 30 min, discharging the soluble oxygen in the solution to obtain a CO<sub>2</sub>-saturated electrolyte. All test potentials without iR compensation were converted to RHE by measuring the Ag/AgCl electrode using the Nernst formula:

$$E \text{ (vs. RHE)} = E \text{ (vs. Ag/AgCl)} + 0.197 \text{ V} + 0.059 \times pH$$

### ***Product analysis***

An Agilent 8890 gas chromatograph (GC) was applied to quantitative analysis of gaseous products. And liquid products were characterized by a Bruker AVANCE NEO 600 <sup>1</sup>H nuclear magnetic resonance (NMR) spectrometer. In this experiment, 500 μL electrolyte was mixed with 100 μL D<sub>2</sub>O solution and 100 μL 10 mmol L<sup>-1</sup> dimethyl

sulfoxide (DMSO) solution, and DMSO was used as the internal standard solution.

The Faraday efficiency (FE) of the product was calculated based on the gas chromatographic peak area, and the formula was as follows<sup>1</sup>:

$$FE_{gas} = \frac{\alpha \times n \times F}{Q} = \frac{\alpha \times F \times p \times V \times 10^{-6} (m^3 mL^{-1}) \times v(vol\%)}{R \times 298.15 (K) \times I(C s^{-1}) \times 60 (s min^{-1})} \times 100\%$$

In this equation,  $\alpha$  represents the number of electrons transferred by a particular product,  $Q$  represents the total charge generated throughout the electrolysis process,  $p$  represents the atmospheric pressure (101.325 kPa),  $V$  represents the gas flow rate,  $v$  (vol%) is the concentration of the gas measured by the GC,  $R$  represents the ideal gas constant ( $R = 8.314 J (mol \cdot K)^{-1}$ ) and  $F$  represents Faraday's constant ( $F = 96485 C mol^{-1}$ ).

The FE of liquid products was calculated as follows as previous report<sup>2</sup>:

$$FE_{liquid} = \frac{C_{product} \times V \times \alpha \times F}{Q} \times 100\%$$

Where  $C_{product}$  is the concentration of the liquid product,  $V$  is the volume of the electrolyte and  $Q$  is the total charge of the CO<sub>2</sub> electroreduction.

### ***In situ ATR-IR measurements details***

Experimental conditions of ATR-IR internal reflection mode: 15  $\mu$ L of the catalyst ink was dripped to the center of the gold-coated silicon crystal and dried for 2 h at room temperature. The silicon crystal, loaded with catalyst, was mounted in a three-electrode system within an in-situ infrared reaction cell. The silicon crystal was connected to a conductive copper foil, which served as the working electrode. In addition, an Ag/AgCl

electrode was used as the reference electrode, and the platinum wire was used as the counter electrode to form a three-electrode system. 0.1 M  $\text{KHCO}_3$  solution was added into the reaction cell. The reaction cell was purified with high-purity  $\text{CO}_2$  gas for 30 min before the experiment, and  $\text{CO}_2$  gas was continuously passed through the cell during the experiment at a flow rate of  $25 \text{ mL min}^{-1}$ . The cell was connected to an electrochemical workstation (CHI760e, Chenhua) for an i-t testing within the range of -1.3 to -0.2 V vs. RHE. Spectra was recorded at open circuit voltage (OCP) for comparison.

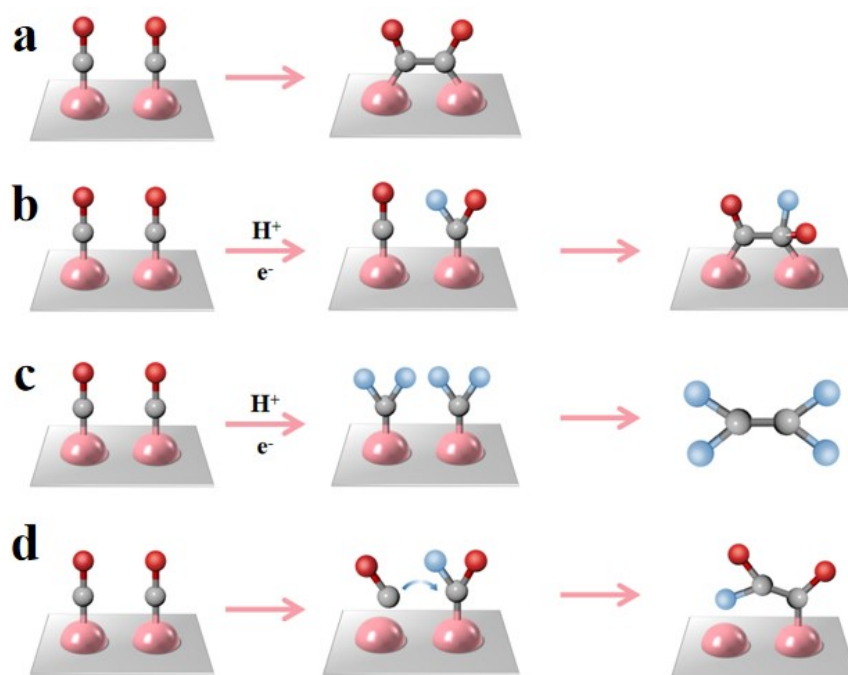

**Figure S1.** Possible C-C coupling mechanisms in ECO<sub>2</sub>RR process. (a, b) Dimerization mechanism. (c) Carbene mechanism. (d) "Insertion of CO in \*CHO" mechanism.

Noted: Cu, Pink; C, Gray; O, Red; H, Blue.

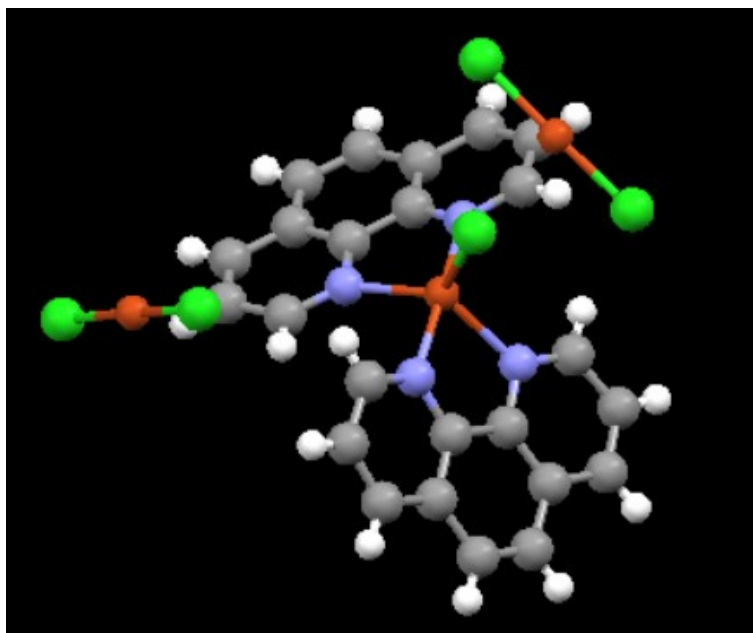

**Figure S2.** Structure of  $[\text{CuCl}(\text{phen})_2][\text{CuCl}_2]$ . Noted: Cu, Orange; Cl, Green; N, Blue; C, Gray; H, White. The  $[\text{CuCl}(\text{phen})_2]^+$  cation contains a five-coordinated Cu(II) ion, which coordinates with one Cl atom and four N atoms from two phenanthroline (phen) ligands, forming a triangular bipyramidal structure.



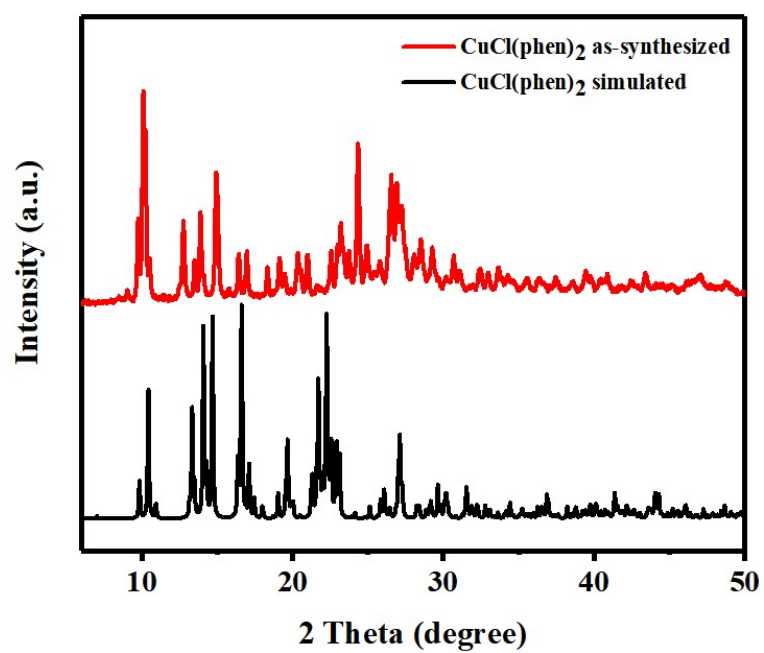

**Figure S3.** Simulated and as-synthesized XRD patterns of  $\text{CuCl(phen)}_2$ .

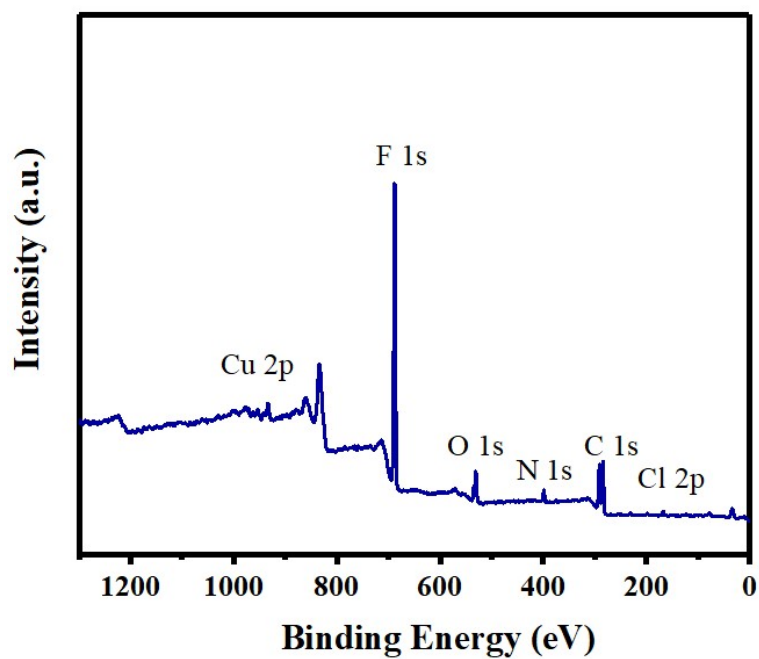

**Figure S4.** XPS survey spectrum of  $[\text{CuCl}(\text{phen})_2][\text{CuCl}_2]$ . The O and F elements in the XPS spectrum are derived from the Nafion solution.

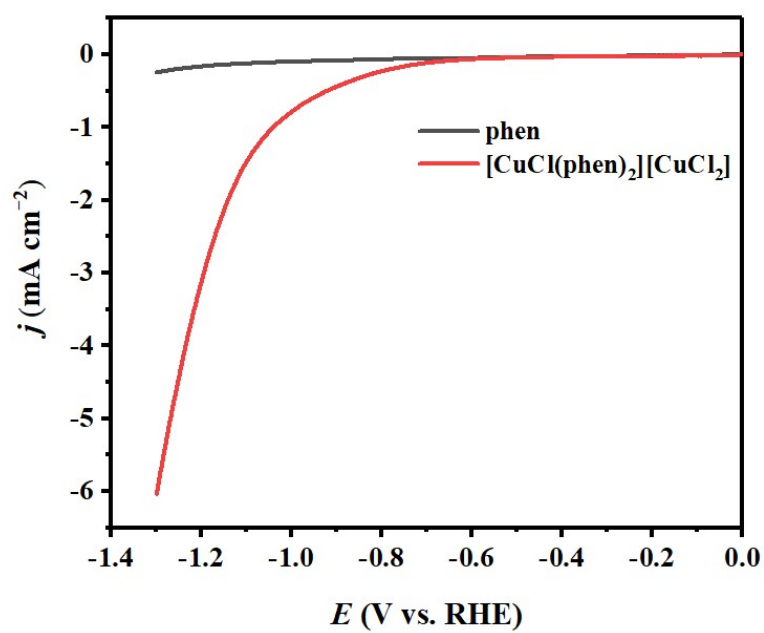

**Figure S5.** LSV curves of phen and  $[\text{CuCl}(\text{phen})_2][\text{CuCl}_2]$  in  $\text{CO}_2$ -saturated 0.1 M  $\text{KHCO}_3$  solution.

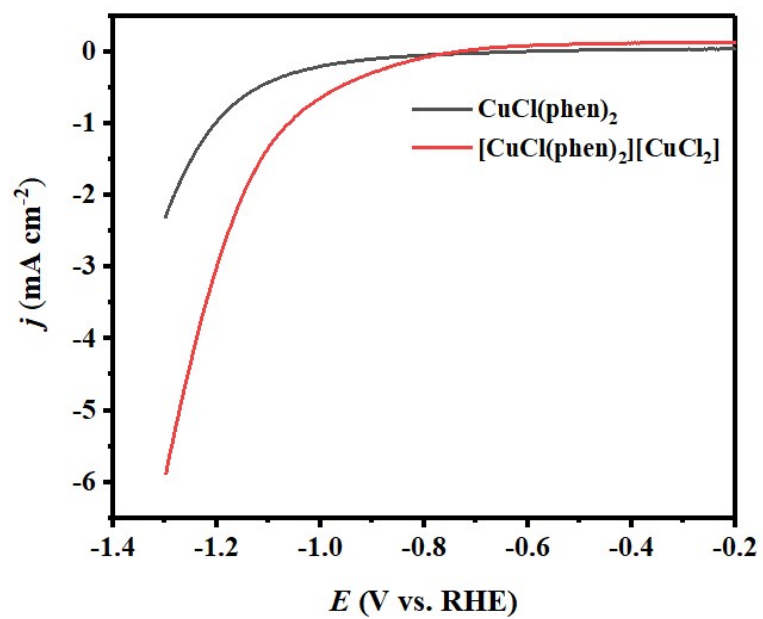

**Figure S6.** LSV curves of  $[\text{CuCl(phen)}_2][\text{CuCl}_2]$  and  $\text{CuCl(phen)}_2$  in  $\text{CO}_2$ -saturated 0.1 M  $\text{KHCO}_3$  solution.

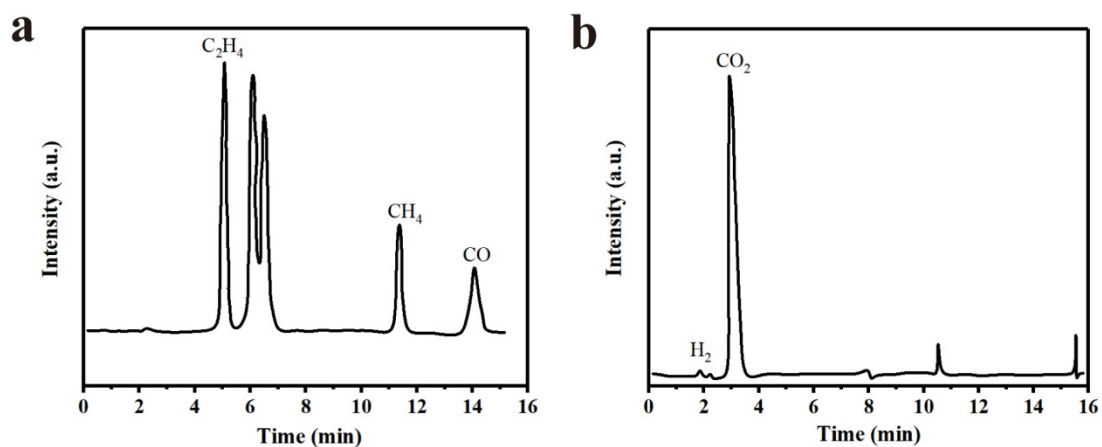

**Figure S7.** GC profiles of the standard gases with different concentrations. GC spectra peaks of (a)  $C_2H_4$ ,  $CH_4$  and  $CO$ , (b)  $H_2$  and  $CO_2$ . The concentrations of  $C_2H_4$ ,  $CH_4$ ,  $CO$  and  $H_2$  are 222.4, 224.1, 221.6 and 502.4 ppm, respectively.

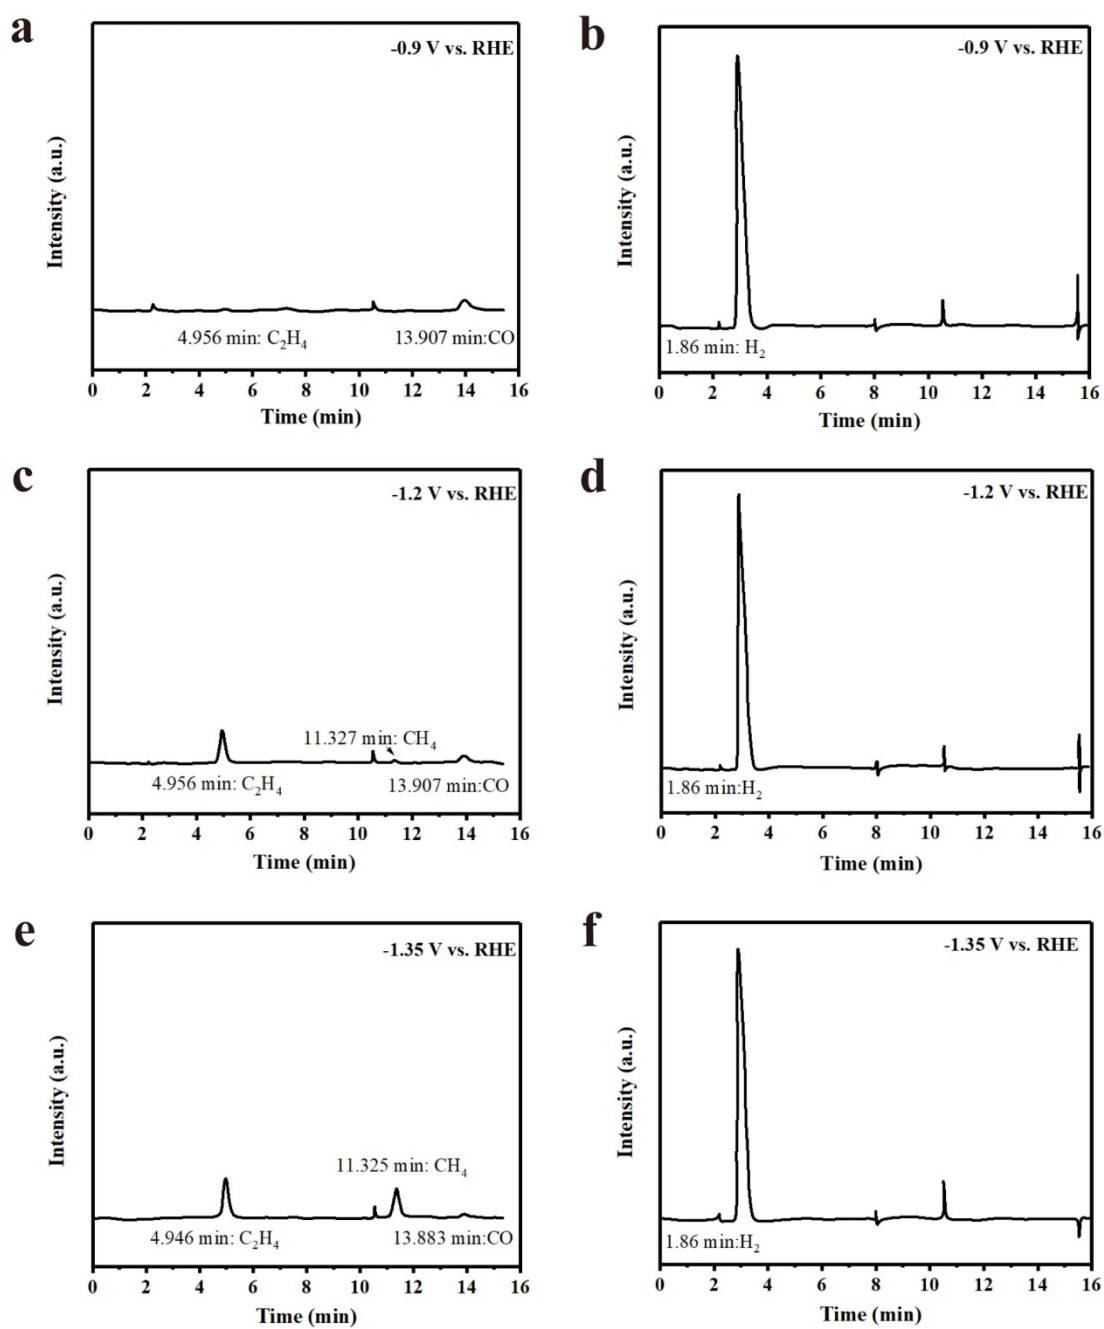

**Figure S8.** GC profiles of [CuCl(phen)<sub>2</sub>][CuCl<sub>2</sub>] catalyzing ECO<sub>2</sub>RR with different potentials: (a, b) -0.9 V vs. RHE, (c, d) -1.2 V vs. RHE and (e, f) -1.35 V vs. RHE.

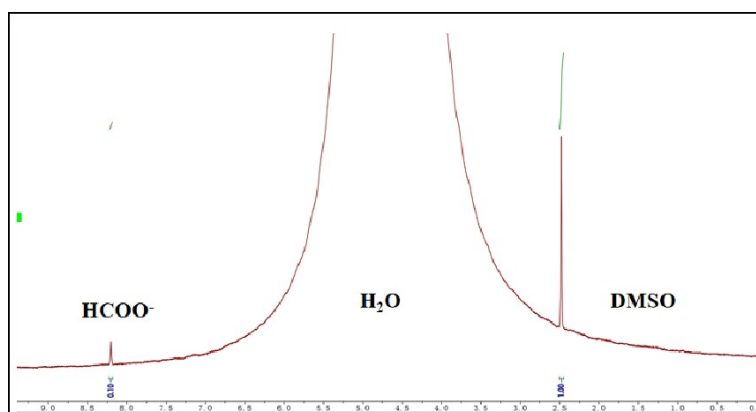

**Figure S9.** <sup>1</sup>H NMR spectrum of the liquid product catalyzed by [CuCl(phen)<sub>2</sub>][CuCl<sub>2</sub>] at -1.2 V vs. RHE after the ECO<sub>2</sub>RR test. The concentration of liquid product was measured using an internal standard, DMSO.

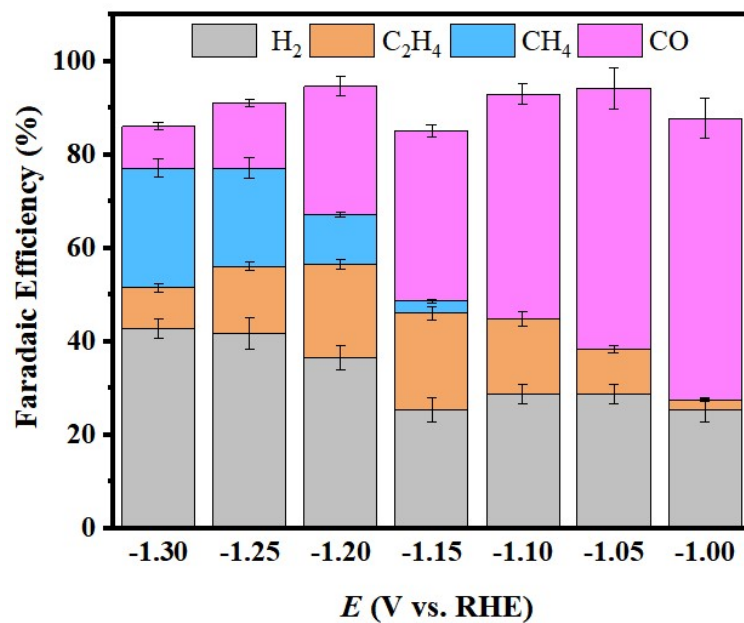

**Figure S10.** FEs of different reduced gaseous products on CuCl(phen)<sub>2</sub> catalyst at different potentials.



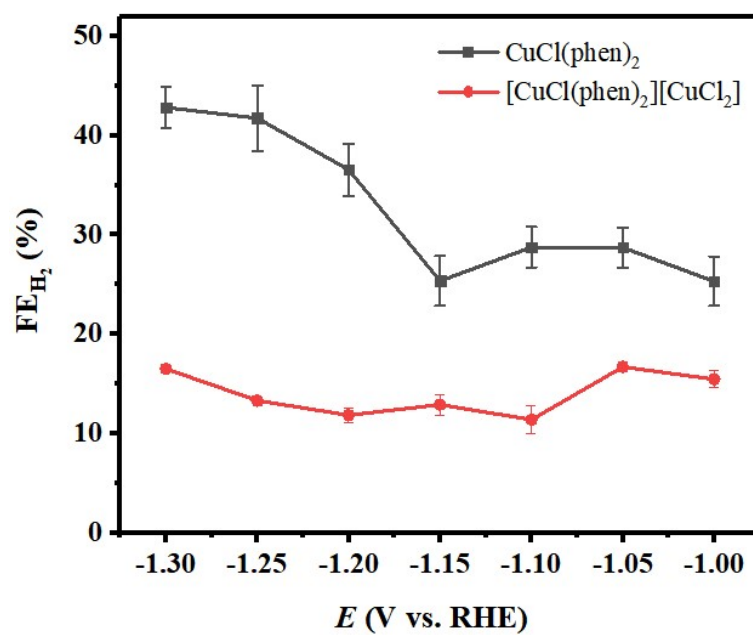

**Figure S11.** FE<sub>H<sub>2</sub></sub> of [CuCl(phen)<sub>2</sub>][CuCl<sub>2</sub>] and CuCl(phen)<sub>2</sub> at different potentials.

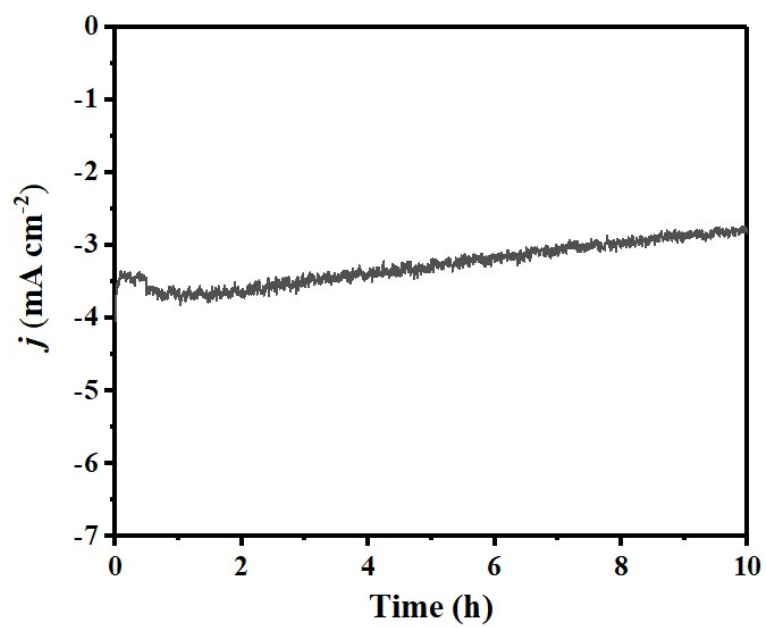

**Figure S12.** Continuous i-t curve of  $[\text{CuCl}(\text{phen})_2][\text{CuCl}_2]$  at -1.2 V vs. RHE.

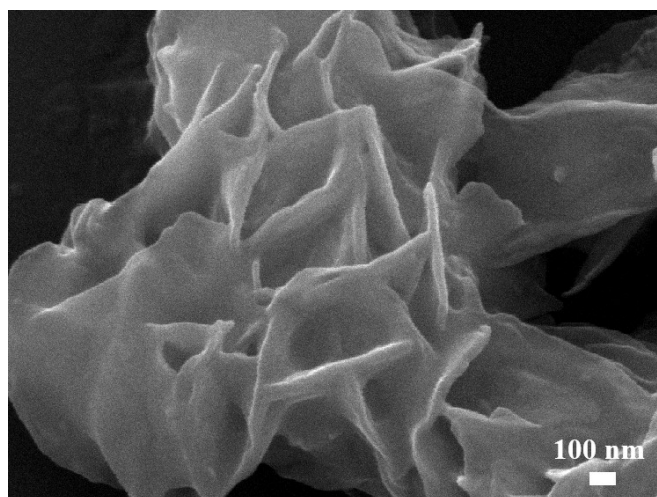

**Figure S13.** SEM image of  $[\text{CuCl}(\text{phen})_2][\text{CuCl}_2]$  after the  $\text{ECO}_2\text{RR}$ .

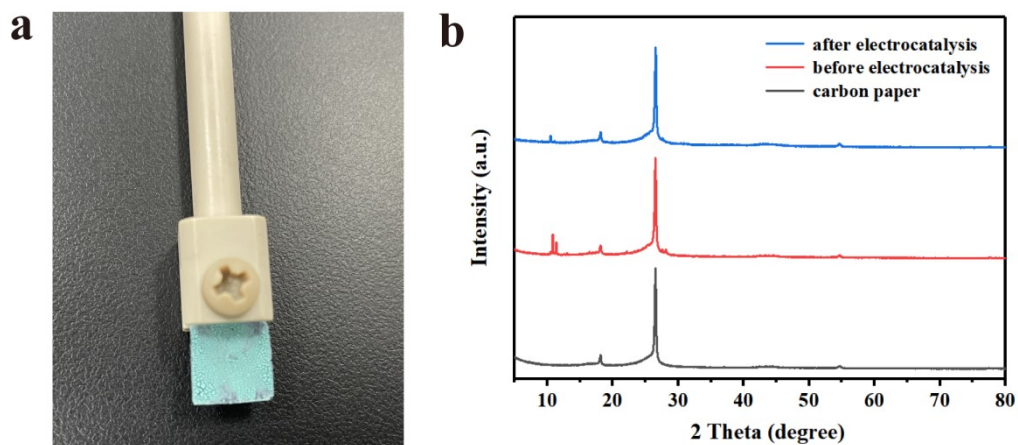

**Figure S14.** (a) Photograph of  $[\text{CuCl}(\text{phen})_2][\text{CuCl}_2]$  dripping on carbon paper. (b) XRD patterns of  $[\text{CuCl}(\text{phen})_2][\text{CuCl}_2]$  dripping on carbon paper before and after the  $\text{ECO}_2\text{RR}$  tests and blank carbon paper.

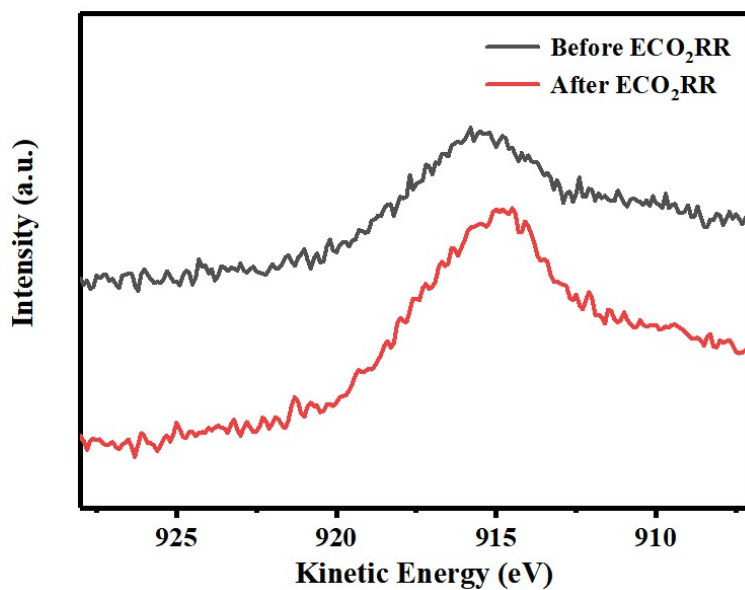

**Figure S15.** Cu Auger spectrum of  $[\text{CuCl}(\text{phen})_2][\text{CuCl}_2]$  before and after the ECO<sub>2</sub>RR test at -1.2 V vs. RHE. The shift of Cu Auger peak towards lower kinetic energy after ECO<sub>2</sub>RR, which indicates an increase in electron cloud density, signifying the reduction from Cu(II) to Cu(I). Meanwhile, the narrowing of Auger peak width implies more homogeneous chemical state of Cu species after the ECO<sub>2</sub>RR test<sup>3</sup>.

**Table S1.** Summary of the ECO<sub>2</sub>RR performances for different Cu-based complexes and Cu metal-organic frameworks (MOFs). All studies were carried out in H-type cells with aqueous electrolyte systems.

| Catalysts                                                                                                                                                                                              | Electrolyte             | <i>E</i> (V vs. RHE) | C <sub>2</sub> H <sub>4</sub> (FE, %) | Ref.      |
|--------------------------------------------------------------------------------------------------------------------------------------------------------------------------------------------------------|-------------------------|----------------------|---------------------------------------|-----------|
| [CuCl(phen) <sub>2</sub> ][CuCl <sub>2</sub> ]                                                                                                                                                         | 0.1M KHCO <sub>3</sub>  | -1.2                 | 47                                    | This work |
| CuCl(phen) <sub>2</sub>                                                                                                                                                                                | 0.1M KHCO <sub>3</sub>  | -1.0                 | 2                                     | 4         |
| CuPPh                                                                                                                                                                                                  | 0.1M KHCO <sub>3</sub>  | -0.96                | 45                                    | 5         |
| [Cu <sub>2</sub> (phen) <sub>2</sub> (OH) <sub>2</sub> (H <sub>2</sub> O) <sub>2</sub> ]<br>[Cu <sub>2</sub> (phen) <sub>2</sub> (OH) <sub>2</sub> Cl <sub>2</sub> ]Cl <sub>2</sub> ·6H <sub>2</sub> O | 0.1M CsHCO <sub>3</sub> | -1.25                | 42                                    | 6         |
| [Cu <sub>2</sub> (NTB) <sub>2</sub> Cl <sub>2</sub> ] <sup>2+</sup>                                                                                                                                    | 0.1M KCl                | -1.28                | 42                                    | 7         |
| PcCu-Cu-O                                                                                                                                                                                              | 0.1M KHCO <sub>3</sub>  | -1.2                 | 50                                    | 8         |
| BIF-102NSs                                                                                                                                                                                             | 0.5M KHCO <sub>3</sub>  | -1.0                 | 11                                    | 9         |
| CuTAPP                                                                                                                                                                                                 | 0.5M KHCO <sub>3</sub>  | -1.0                 | 3                                     | 10        |
| Cu <sub>2</sub> BDC                                                                                                                                                                                    | 0.1M KI                 | -1.3                 | 34                                    | 11        |
| Au NN@PCN-222(Cu)                                                                                                                                                                                      | 0.1M KHCO <sub>3</sub>  | -1.2                 | 53                                    | 12        |
| S-HKUST-1                                                                                                                                                                                              | 0.1M KHCO <sub>3</sub>  | -1.3                 | 60                                    | 13        |

## References

- 1 Yang HB, Hung SF, Liu S, Yuan K, Miao S, Zhang L, Huang X, Wang HY, Cai W, Chen R, Gao J. Atomically dispersed Ni (i) as the active site for electrochemical CO<sub>2</sub> reduction. *Nat. Energy*. 2018, **3** (2), 140-147.
- 2 Liu S, Wang T, Liu X, Liu J, Shi H, Lai J, Liang J, Li S, Cai Z, Huang Y, Li Q. In Situ Dissociated Chalcogenide Anions Regulate the Bi-Catalyst/Electrolyte Interface with Accelerated Surface Reconstruction toward Efficient CO<sub>2</sub> Reduction. *ACS Catal*. 2023, **14** (1), 489-497.
- 3 Zhang W, Huang C, Xiao Q, Yu L, Shuai L, An P, Zhang J, Qiu M, Ren Z, Yu Y. Atypical Oxygen-Bearing Copper Boosts Ethylene Selectivity toward Electrocatalytic CO<sub>2</sub> Reduction. *J. Am. Chem. Soc.* 2020, **142** (26), 11417-11427.
- 4 Wang J, Gan L, Zhang Q, Reddu V, Peng Y, Liu Z, Xia X, Wang C, Wang X. A water-soluble Cu complex as molecular catalyst for electrocatalytic CO<sub>2</sub> reduction on graphene-based electrodes. *Adv. Energy Mater.* 2019, **9**, 1803151.
- 5 Wang P, Li T, Wu Q, Du R, Zhang Q, Huang WH, Chen CL, Fan Y, Chen H, Jia Y, Dai S. Molecular assembled electrocatalyst for highly selective CO<sub>2</sub> fixation to C<sub>2+</sub> products. *ACS Nano*. 2022, **16**, 17021-17032.
- 6 Liu N, Bartling S, Springer A, Kubis C, Bokareva OS, Salaya E, Sun J, Zhang Z, Wohlrab S, Abdel-Mageed AM, Liang HQ. Heterogenized Molecular Electrocatalyst Based on a Hydroxo-Bridged Binuclear Copper (II) Phenanthroline Compound for Selective Reduction of CO<sub>2</sub> to Ethylene. *Adv. Mater.* 2024, **36**, 2309526.
- 7 Balamurugan M, Jeong HY, Choutipalli VS, Hong JS, Seo H, Saravanan N, Jang JH, Lee KG, Lee YH, Im SW, Subramanian V. Electrocatalytic reduction of CO<sub>2</sub> to ethylene by molecular Cu-

- complex immobilized on graphitized mesoporous carbon. *Small*. 2020, **16**, 2000955.
- 8 Qiu XF, Zhu HL, Huang JR, Liao PQ, Chen XM. Highly selective CO<sub>2</sub> electroreduction to C<sub>2</sub>H<sub>4</sub> using a metal-organic framework with dual active sites. *J. Am. Chem. Soc.* 2021, **143**, 7242-7246.
- 9 Shao P, Zhou W, Hong QL, Yi L, Zheng L, Wang W, Zhang HX, Zhang H, Zhang J. Synthesis of a boron-imidazolate framework nanosheet with dimer copper units for CO<sub>2</sub> electroreduction to ethylene. *Angew. Chem. Int. Ed.* 2021, **60**, 16687-16692.
- 10 Yu P, Lv X, Wang Q, Huang H, Weng W, Peng C, Zhang L, Zheng G. Promoting electrocatalytic CO<sub>2</sub> reduction to CH<sub>4</sub> by copper porphyrin with donor-acceptor structures. *Small*. 2023, **19**, 2205730.
- 11 Zhou X, Dong J, Zhu Y, Liu L, Jiao Y, Li H, Han Y, Davey K, Xu Q, Zheng Y, Qiao SZ. Molecular scalpel to chemically cleave metal-organic frameworks for induced phase transition. *J. Am. Chem. Soc.* 2021, **143**, 6681-6690.
- 12 Xie X, Zhang X, Xie M, Xiong L, Sun H, Lu Y, Mu Q, Rummeli MH, Xu J, Li S, Zhong J. Au-activated N motifs in non-coherent cupric porphyrin metal organic frameworks for promoting and stabilizing ethylene production. *Nat. Commun.* 2022, **13**, 63.
- 13 Wen CF, Zhou M, Liu PF, Liu Y, Wu X, Mao F, Dai S, Xu B, Wang XL, Jiang Z, Hu P. Highly Ethylene-Selective Electrocatalytic CO<sub>2</sub> Reduction Enabled by Isolated Cu-S Motifs in Metal-Organic Framework Based Precatalysts. *Angew. Chem. Int. Ed.* 2022, **61**, 202111700.
